# Supplementary material for: Water-powered self-propelled magnetic nanobot for rapid and highly efficient capture of circulating tumor cells
Source: PubMed Central journal article supplement (PMC9814645; doi:10.1038/s42004-021-00598-9), 2021-11-18
Supplement: 42004_2021_598_MOESM1_ESM.pdf [file 42004_2021_598_MOESM1_ESM.pdf]

# **Water-Powered Self-Propelled Magnetic Nanobot for Rapid and Highly Efficient Capture of Circulating Tumor Cells**

## **Supplementary Information**

Ravindra D. Wavhale,<sup>1</sup> Kshama D. Dhobale,<sup>1</sup> Chinmay S. Rahane,<sup>1</sup> Govind P. Chate,<sup>1</sup>  
Bhausahab V. Tawade,<sup>1</sup> Yuvraj N. Patil,<sup>1</sup> Sandesh S. Gawade<sup>2</sup> and Shashwat S. Banerjee\*<sup>1</sup>

<sup>1</sup>Central Research Laboratory, Maharashtra Institute of Medical Education and Research,  
Talegaon Dabhade, Pune 410507, India

<sup>2</sup>Department of Surgery, Maharashtra Institute of Medical Education and Research, Talegaon  
Dabhade, Pune 410507, India

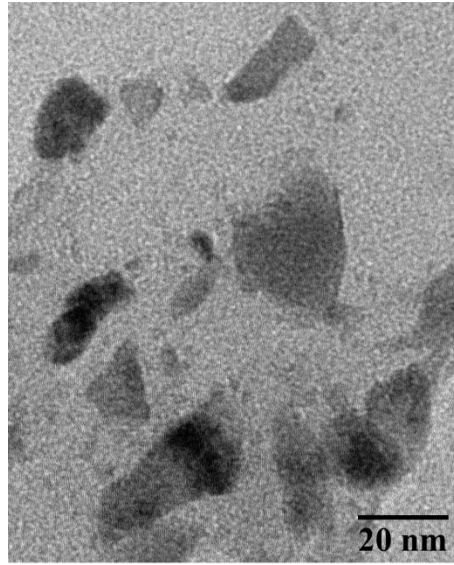

**Supplementary Figure S1.** TEM image of MFN.

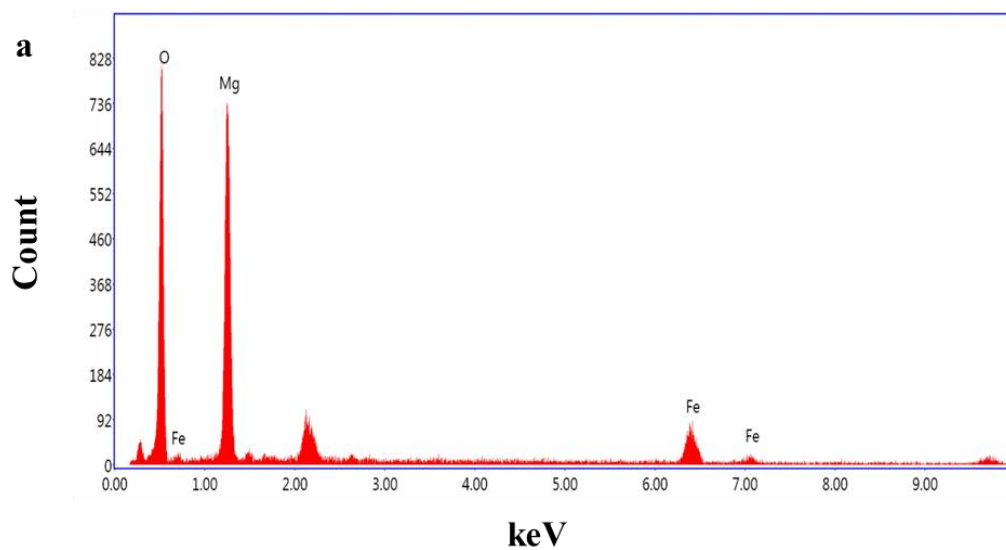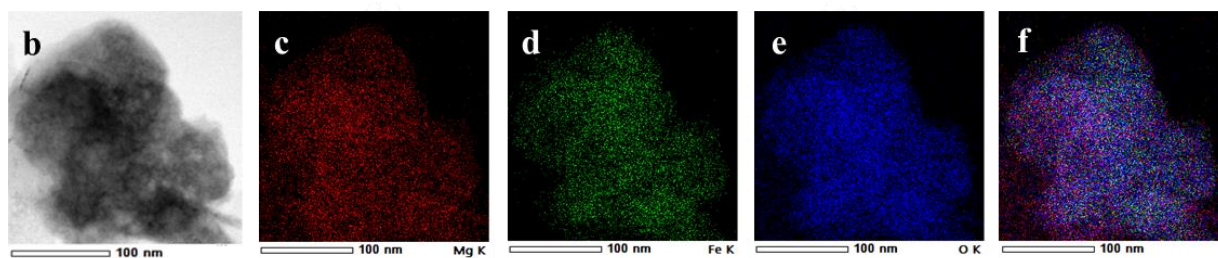

**Supplementary Figure S2. a**, STEM-energy dispersive X-ray spectrum (EDX) of MFN showing magnesium (Mg), iron (Fe), and oxygen (O). **b-f**, Scanning transmission electron microscopy (STEM) image of MFN with corresponding elemental maps.

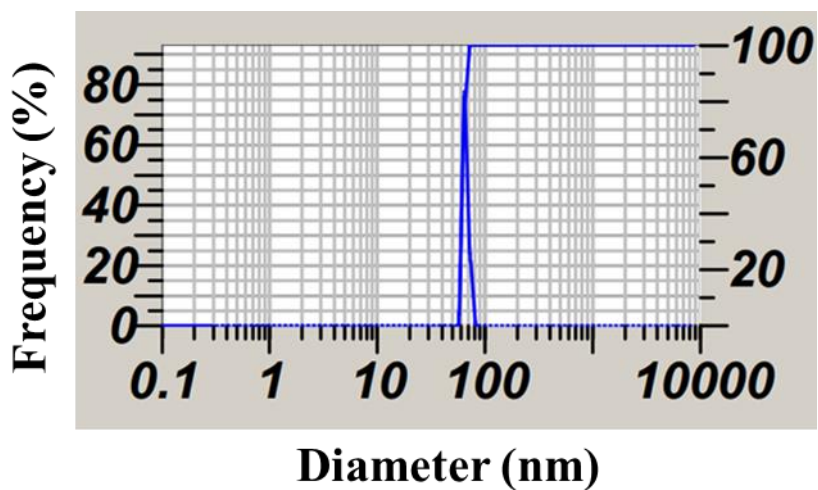

**Supplementary Figure S3.** Dynamic light scattering (DLS) size distribution curve of MFN.

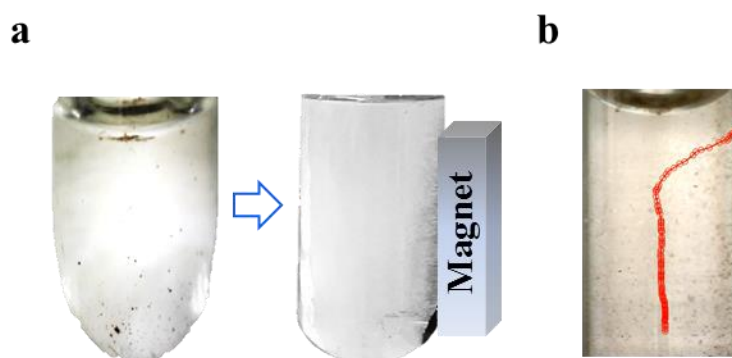

**Supplementary Figure S4. a,** MFN are drawn from the solution to the sidewall of the vial when exposed to a magnetic field due to the presence of  $\text{Fe}_3\text{O}_4$  hemispherical shell. **b,** Tracking trajectories of autonomously propelling MFN when exposed to a magnetic field.

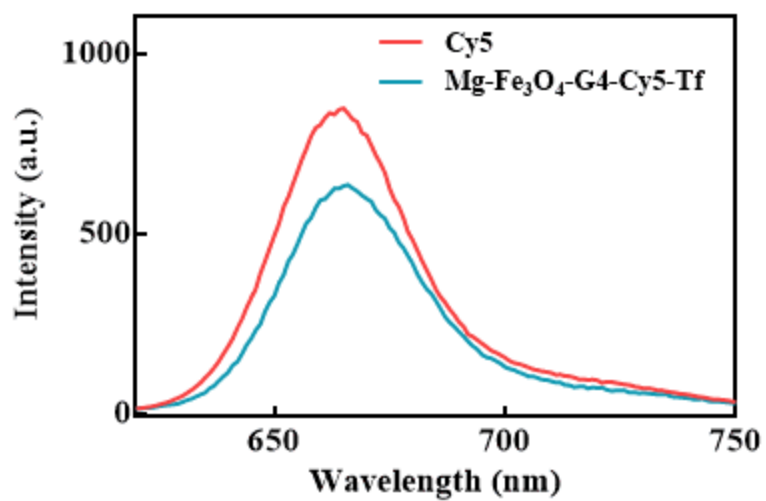

**Supplementary Figure S5.** Normalized fluorescence emission spectra of Cy5 and MFN in PBS.

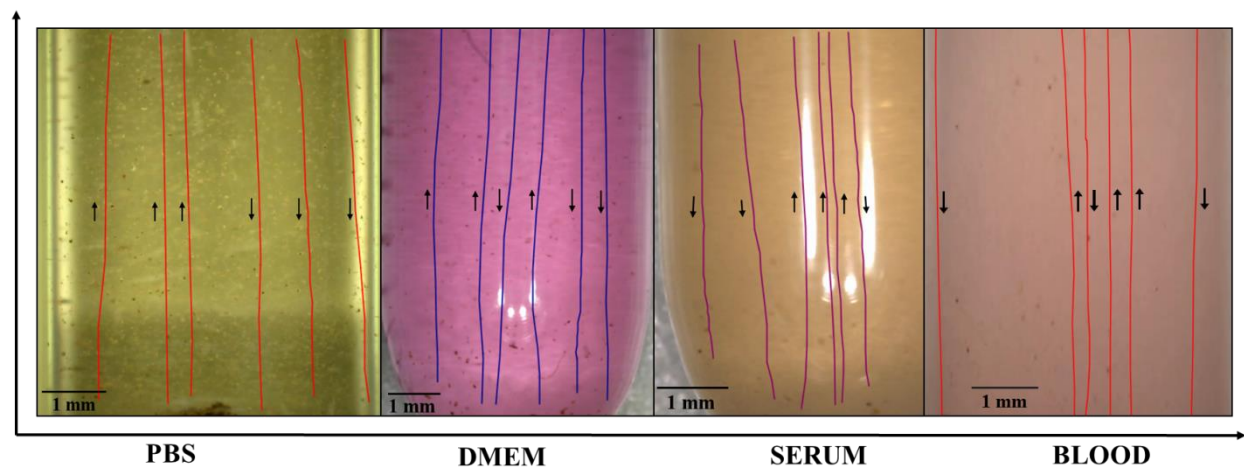

**Supplementary Figure S6.** Analysis of the motion behavior of MFN. Representative tracking trajectories of MFNs in different biologically relevant media.

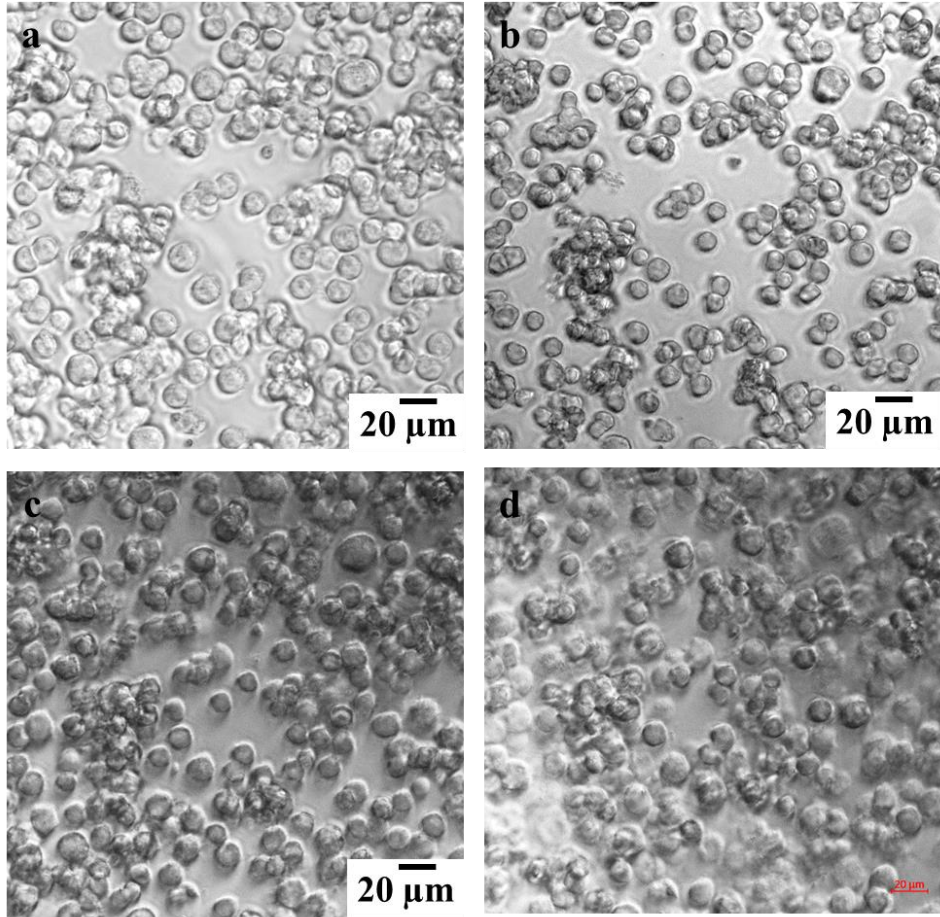

**Supplementary Figure S7.** Effect of  $\text{NaHCO}_3$  on HCT116 cells at **a**, 0 min, **b**, 10 min, **c**, 30 min and **d**, 60 min.  $\text{NaHCO}_3$  does not appear to perturb cell significantly as seen in the images.

**Supplementary Table S1.** Total propulsion time of MFN in various media.

| NaHCO <sub>3</sub> Conc (M). | MNF propulsion time (min) |     |
|------------------------------|---------------------------|-----|
|                              | 0                         | 0.5 |
| DMEM                         | 1.1                       | 5.2 |
| PBS                          | 0                         | 5.8 |
| Serum                        | 7                         | >28 |

**Supplementary Table S2.** Number of HCT116 and MCF7 cells captured with MFNs in various biological media.

| Cells Added | NanoSystem Used  |       |          |       |                               |      |                               |      | Media       |
|-------------|------------------|-------|----------|-------|-------------------------------|------|-------------------------------|------|-------------|
|             | MFN (Tf)         |       | MFN (Ab) |       | MFN (Tf) + NaHCO <sub>3</sub> |      | MFN (Ab) + NaHCO <sub>3</sub> |      |             |
|             | % Cells Captured |       |          |       |                               |      |                               |      |             |
|             | HCT116           | MCF7  | HCT116   | MCF7  | HCT116                        | MCF7 | HCT116                        | MCF7 |             |
| 10          | 25               | 29.17 | 40       | 45.83 | 100                           | 100  | 100                           | 100  | DMEM        |
| 25          | 29.17            | 50.00 | 31.25    | 55.36 | 100                           | 100  | 100                           | 100  |             |
| 50          | 48.04            | 36.44 | 46.08    | 39.83 | 99.04                         | 100  | 99.04                         | 100  |             |
| 75          | 46.58            | 42.11 | 43.84    | 48.68 | 97.95                         | 100  | 97.95                         | 100  |             |
| 100         | 37.86            | 47.14 | 35.92    | 50.00 | 93.81                         | 100  | 93.30                         | 100  |             |
| 10          | 36.11            | 39.29 | 37.5     | 32.14 | 100                           | 100  | 100                           | 100  | PBS         |
| 25          | 38.37            | 57.14 | 36.67    | 48.22 | 100                           | 100  | 100                           | 100  |             |
| 50          | 55.67            | 55.66 | 52.54    | 47.17 | 95.69                         | 100  | 100                           | 100  |             |
| 75          | 31.08            | 51.32 | 35.14    | 55.92 | 96.53                         | 100  | 95.14                         | 100  |             |
| 100         | 25.21            | 51.38 | 29.21    | 40.83 | 92.07                         | 100  | 91.01                         | 100  |             |
| 10          | 50               | 68.75 | 44.44    | 50    | 100                           | 100  | 100                           | 100  | Blood       |
| 25          | 66.67            | 56.90 | 64.81    | 41.38 | 100                           | 100  | 100                           | 100  |             |
| 50          | 43.86            | 50.00 | 39.47    | 38.46 | 98.18                         | 100  | 99.09                         | 100  |             |
| 75          | 56.76            | 51.33 | 41.22    | 44.00 | 99.31                         | 100  | 98.61                         | 100  |             |
| 100         | 50.49            | 54.95 | 56.80    | 48.52 | 98.44                         | 100  | 98.96                         | 100  |             |
| 10          | 40               | 59.09 | 35       | 50    | 100                           | 100  | 100                           | 100  | Lysed Blood |
| 25          | 58.93            | 52.00 | 41.07    | 38    | 100                           | 100  | 100                           | 100  |             |
| 50          | 54.81            | 54.81 | 66.35    | 35.58 | 98.98                         | 100  | 98.98                         | 100  |             |
| 75          | 41.22            | 52.00 | 45.95    | 45.33 | 98.70                         | 100  | 98.70                         | 100  |             |
| 100         | 45.75            | 63.27 | 44.81    | 50    | 97.89                         | 100  | 98.86                         | 100  |             |

**Supplementary Table S3.** Number of cancer cells captured by recent typical nanomaterial-based CTC isolation approaches.

| <b>Sr. No</b> | <b>Nanoparticle</b>                                                                                         | <b>Cell line used for testing</b>   | <b>Cell count utilized for capture efficiency</b> | <b>Incubation Time</b> | <b>Capture efficiency</b>                                                        | <b>Reference</b> |
|---------------|-------------------------------------------------------------------------------------------------------------|-------------------------------------|---------------------------------------------------|------------------------|----------------------------------------------------------------------------------|------------------|
| 1             | Anti-EpCAM-modified F-MNPs and dual (EpCAM-modified and anti-N-cadherin-modified ) antibody-modified F-MNPs | MCF-7                               | 10-200 cells/mL                                   | >20 min                | 97% with Anti-EpCAM-modified F-MNPs and 98.8% with dual antibody-modified F-MNPs | [1]              |
| 2             | Anti-EpCAM antibody modified RBC-IMNs (Immunomagnetic micro/nanoparticles)                                  | MCF-7 and PC-3                      | 10-200 cells/mL                                   | 0-24 h                 | ~90% in PBS, ~60% in blood                                                       | [2]              |
| 3             | MNPs@hydrogel-anti-EpCAM nanoparticles                                                                      | MCF-7                               | 5-100 cells/mL                                    | 25 min                 | 97% in PBS and 96% in blood                                                      | [3]              |
| 4             | Gelatin nanoparticle-coated silica microbead functionalized with anti-EpCAM and anti-CD146 Abs              | MCF-7, MDA-MB-231, HCT116 and HT-29 | 20-250 cells/mL                                   | 20 min                 | >80%                                                                             | [4]              |
| 5             | Hollow glass microspheres modified anti-EpCAM antibody                                                      | MCF7                                | 30-1000 cells/ml in 5x diluted blood              | 20 min                 | 93.6%                                                                            | [5]              |



**Supplementary Table S4.** CTCs captured by MFN in clinical samples of epithelial cancer patients.

| <b>Cancer patient data for clinical trials</b> |                    |                                                |
|------------------------------------------------|--------------------|------------------------------------------------|
| <b>Sr. No.</b>                                 | <b>Cancer type</b> | <b>Number of CTCs mL<sup>-1</sup> observed</b> |
| <b>1</b>                                       | Colorectal         | 0                                              |
| <b>2</b>                                       | Breast             | 3                                              |
| <b>3</b>                                       | Lung               | 0                                              |
| <b>4</b>                                       | Breast             | 5                                              |
| <b>5</b>                                       | Ovarian            | 1                                              |

### **Supplementary References**

- 1 Wang, Z. *et al.* High-Efficiency Isolation and Rapid Identification of Heterogeneous Circulating Tumor Cells (CTCs) Using Dual-Antibody-Modified Fluorescent-Magnetic Nanoparticles. *ACS Appl Mater Interfaces* **11**, 39586-39593, (2019).
- 2 Meng, Q.-F. *et al.* Biomimetic immunomagnetic nanoparticles with minimal nonspecific biomolecule adsorption for enhanced isolation of circulating tumor cells. *ACS applied materials & interfaces* **11**, 28732-28739 (2019).
- 3 Wang, Z. *et al.* Antifouling hydrogel-coated magnetic nanoparticles for selective isolation and recovery of circulating tumor cells. *Journal of Materials Chemistry B* **9**, 677-682 (2021).
- 4 Huang, Q. *et al.* Gelatin nanoparticle-coated silicon beads for density-selective capture and release of heterogeneous circulating tumor cells with high purity. *Theranostics* **8**, 1624 (2018).
- 5 Dong, Z. *et al.* Enhanced capture and release of circulating tumor cells using hollow glass microspheres with a nanostructured surface. *Nanoscale* **10**, 16795-16804 (2018).
