# Supplementary material for: Water-powered self-propelled magnetic nanobot for rapid and highly efficient capture of circulating tumor cells
Source: PubMed Central journal article supplement (PMC9814645; doi:10.1038/s42004-021-00598-9), 2021-11-18
Supplement: 42004_2021_598_MOESM2_ESM.pdf [file 42004_2021_598_MOESM2_ESM.pdf]

## **Description of Additional Supplementary Files**

**File Name:** Supplementary Movie 1

**Description:** Propulsion of nanorobots by generation of bubbles
